# Supplementary material for: Atomic insight into short helical peptide comprised of consecutive multiple aromatic residues
Source: Royal Society of Chemistry journal article supplement (doi:10.1039/d2cc01038k), 2022-01-01
Supplement: d2cc01038k1.pdf [file d2cc01038k1.pdf]

## Supporting Information

### **Atomic Insight into Short Helical Peptide Comprised of Consecutive Multiple Aromatic Residues**

Rajkumar Misra,<sup>a,b</sup> Thangavel Vijayakanth,<sup>c</sup> Linda J. W. Shimon,<sup>d</sup> Lihi Adler-Abramovich<sup>a\*</sup>

*<sup>a</sup>Department of Oral Biology, The Goldschleger School of Dental Medicine, Sackler Faculty of Medicine, The Center for Physics & Chemistry of Living Systems, and the Center for Nanoscience and Nanotechnology, Tel-Aviv University, 69978, Israel. E-mail: [lihiA@tauex.tau.ac.il](mailto:lihiA@tauex.tau.ac.il)*

*<sup>b</sup>Department. of Med. Chem, NIPER Mohali, 160062, S.A.S. Nagar (Mohali), India*

*<sup>c</sup>The Shmunis School of Biomedicine and Cancer Research George S. Wise, Faculty of Life Sciences, Tel Aviv University, Tel Aviv, 6997801, Israel*

*<sup>d</sup>Department of Chemical Research Support, The Weizmann Institute of Science, 761000, Rehovot, Israel*

### **General methods:**

All the peptides were purchased from GL Biochem. For self-assembly studies, peptides **P1** and **P2**, 1.5 mg of the peptide was dissolved in 100 $\mu$ L THF and diluted to 500  $\mu$ L water. Crystalline needles and spherical microstructures appeared after 2 days and these were further characterized by microscopic techniques as follows.

### **Scanning electron microscopy:**

A 20  $\mu$ L aliquot of the above solution was dried at room temperature on a microscope cover slip and coated with gold. Scanning electron microscopy (SEM) images were taken using a JSM JEOL 6300 SEM operating at 20 kV and (JEOL, Tokyo, Japan) operating at 20 kV.

### **Transmission electron microscopy:**

A 4  $\mu$ L aliquot of the solution was placed on a 400 mesh copper grids. After 1 min, excess fluid was removed and the sample was left to dry at room temperature. Samples were viewed using a JEOL 1200EX electron microscope operating at 80 kV.

### **Optical Microscopy:**

A 20  $\mu$ L aliquot of the solution was placed on a glass slide and bright-field imaging was performed using an Eclipse Ti-E inverted microscope (Nikon, Japan), equipped with a Zyla SCMOS camera (Andor, UK).

### **CD spectroscopy:**

CD spectra of the peptides **P1** and **P2** (0.5mg/mL) in TFE were recorded using a Chirascan spectrometer (Applied Photophysics) fitted with a Peltier temperature controller set to 25  $^{\circ}$ C, using quartz cuvettes with an optical path length of 0.1 mm (Hellma Analytics). The scan was performed in steps of 1 nm over a wavelength range of 190-260 nm with a spectral bandwidth of 1.0 nm and an averaging time of 3 s. The full spectrum of the sample was collected three times and averaged. The baseline was similarly recorded for TFE and subtracted from the sample spectra. Data processing was performed using Pro-Data Viewer software (Applied Photophysics).

### **FTIR spectroscopy:**

A 50  $\mu$ L aliquot of the peptide **P1** (2mg/mL) in isopropanol and a 50  $\mu$ L aliquot of the peptide **P2** (2mg/mL) in acetonitrile were each deposited on disposable KBr infrared sample cards (Sigma-Aldrich), then dried under vacuum. FTIR spectra were collected using a nitrogen-purged Nicolet Nexus 470 FTIR spectrometer (Nicolet) equipped with a deuterated triglycine sulfate detector. Measurements were performed using a 4 cm<sup>-1</sup> resolution, averaging 64 scans. The absorbance maxima values were determined using an OMNIC analysis program (Nicolet). The background was subtracted using a control spectrum. To understand the conformation in the assembled state of the peptide **P1**, it was dissolved in 100 $\mu$ L THF and diluted to 500 $\mu$ L water. 100 $\mu$ L of this solution was then deposited on disposable KBr infrared sample cards (Sigma-Aldrich), dried under vacuum, and analyzed under the similar condition.

### **Crystallization and Structure Determination:**

Single crystals suitable for X-ray diffraction were grown by slow evaporation of isopropanol and acetonitrile for peptide **P1** and **P2** at room temperature. Crystals of diffraction-quality were obtained after 5 days of sample preparation. For data collection, crystals were coated in paratone oil (Hampton Research), mounted on a MiTeGen cryo-loop and flash-frozen in liquid nitrogen. Diffraction data for **P1** were collected at 100 K on a Rigaku XtaLabPro equipped with a Dectris Pilatus 200K detector. Diffraction data for **P2** were collected at 100 K on a Rigaku Synergy R rotating anode system with a HyPix-Arc 150 detector using CuK $\alpha$  radiation at  $\lambda = 1.54184 \text{ \AA}$ . Data were processed and reduced with CrysAlisPro. The structures were solved by direct methods using SHELXT-2018<sup>1</sup> as implemented in Olex2 and refined by full matrix least squares against F2 with SHELXL-2013. All non-hydrogen atoms were refined with anisotropic temperature factors. Hydrogen atoms were placed in calculated positions and refined in the riding mode. The crystallographic data are given for peptide **P1** in Table S5 and for peptide **P2** in table S6. Crystallographic data have been deposited at the Cambridge Crystallographic Data Centre (CCDC), under deposition number CCDC 2123307, 2132310.

**Table S1:** Torsion Angles of the Peptide **P1**:

| Residue | $\phi$ (deg) | $\Psi$ (deg) |
|---------|--------------|--------------|
| Aib1    | -53          | -48          |
| Phe2    | -67          | -26          |
| Phe3    | -52          | -45          |
| Phe4    | -73          | -14          |
| Phe5    | -71          | -39          |
| Phe6    | -97          | -2           |
| Aib7    | -60          | -37          |

**Table S2:** Torsion Angles of the Peptide **P2**:

| Residue | $\phi$ (deg) | $\Psi$ (deg) |
|---------|--------------|--------------|
| Aib1    | -50          | -46          |
| Phe2    | -71          | -25          |
| Phe3    | -65          | -48          |
| Phe4    | -63          | -36          |
| Phe5    | -62          | -47          |
| Phe6    | -80          | -37          |
| Phe7    | -114         | -4           |

**Table S3:** Hydrogen Bonding Parameters peptide **P1**

Intramolecular H bond:

| Donor<br>(D) | Acceptor<br>(A) | D.... A<br>(Å) | DH.... A<br>(Å) | NH.... O<br>(deg) |
|--------------|-----------------|----------------|-----------------|-------------------|
| N3           | O1              | 2.98           | 2.40            | 123               |
| N4           | O2              | 2.99           | 2.35            | 129               |
| N5           | O2              | 3.07           | 2.42            | 131               |
| N6           | O3              | 3.28           | 2.49            | 149               |
| N7           | O4              | 2.86           | 2.53            | 103               |

Intermolecular H bond:

| Donor<br>(D) | Acceptor<br>(A) | D.... A<br>(Å) | DH.... A<br>(Å) | NH.... O<br>(deg) |
|--------------|-----------------|----------------|-----------------|-------------------|
| N2           | O8              | 2.81           | 1.94            | 168               |
| N1           | O7              | 3.02           | 2.49            | 120               |
| N8           | O5              | 2.96           | 2.08            | 174               |

**Table S4:** Hydrogen Bonding Parameters peptide **P2**

Intramolecular H bond:

| Donor<br>(D) | Acceptor<br>(A) | D.... A<br>(Å) | DH.... A<br>(Å) | NH.... O<br>(deg) |
|--------------|-----------------|----------------|-----------------|-------------------|
| N3           | O1              | 2.91           | 2.32            | 124               |
| N4           | O1              | 3.16           | 2.30            | 165               |
| N5           | O2              | 2.87           | 2.07            | 151               |
| N6           | O3              | 3.03           | 2.17            | 162               |
| N7           | O4              | 2.87           | 2.07            | 150               |
| N8           | O5              | 2.89           | 2.15            | 141               |



Intermolecular H bond:

| Donor<br>(D) | Acceptor<br>(A) | D.... A<br>(Å) | DH.... A<br>(Å) | NH.... O<br>(deg) |
|--------------|-----------------|----------------|-----------------|-------------------|
| N2           | O7              | 2.98           | 2.13            | 162               |
| N1           | O6              | 2.76           | 1.89            | 169               |

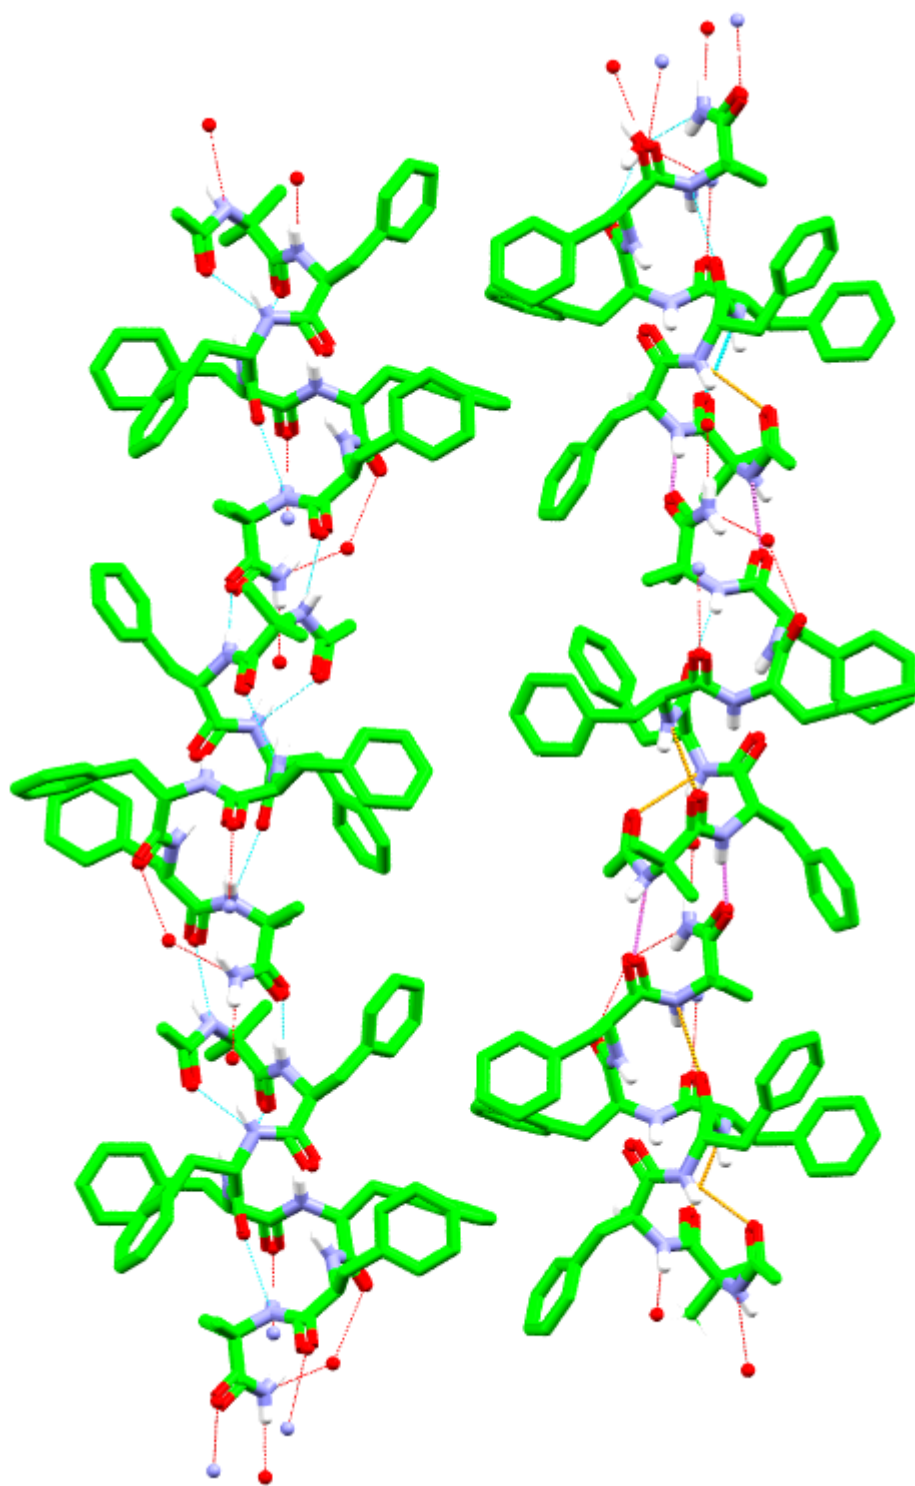

**Figure S1:** Super helical packing of peptide **P1** through head to tail hydrogen bonding.

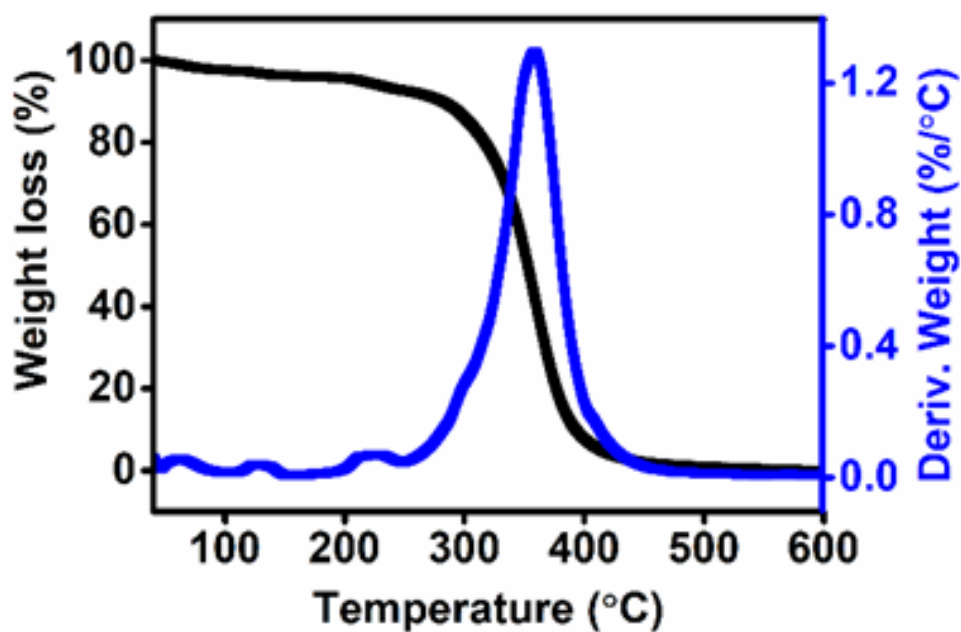

**Figure S2:** Thermogravimetric analysis of P1 crystals (black curve) revealing the high thermal stability ( $\geq 300$  °C). The weight loss is depicted by the first derivative curve (blue).

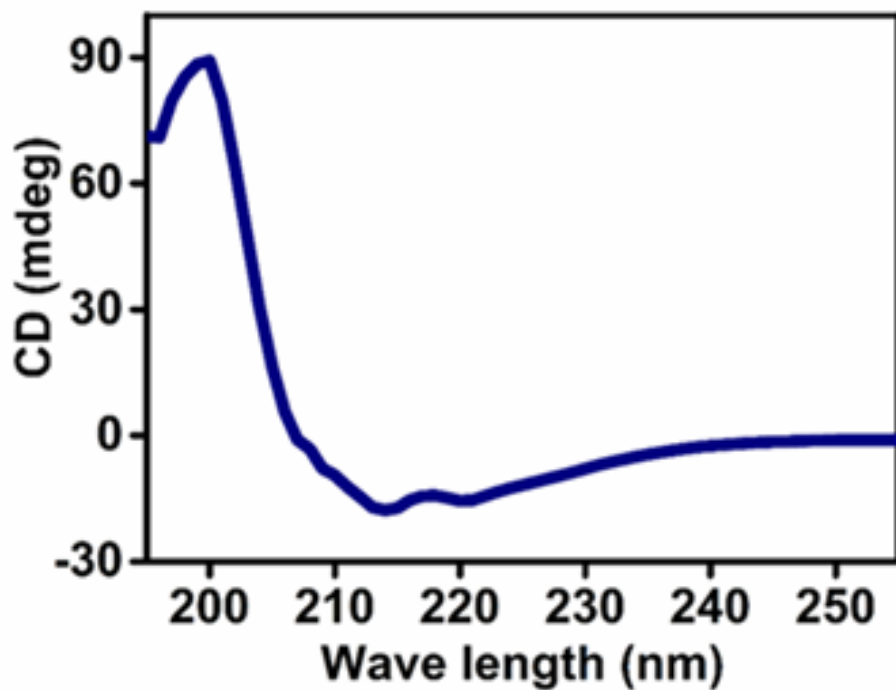

**Figure S3:** CD spectrum of the P1 peptide in TFE (0.5mg/mL), indicating helical organization.

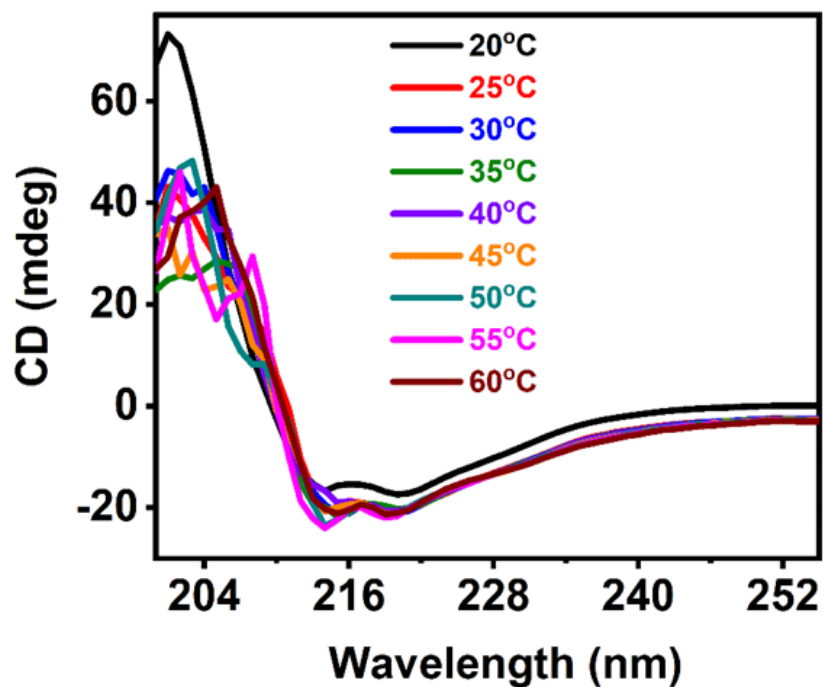

Figure S4: Temperature-dependent CD spectrum of the P1 peptide in TFE (0.5mg/mL).

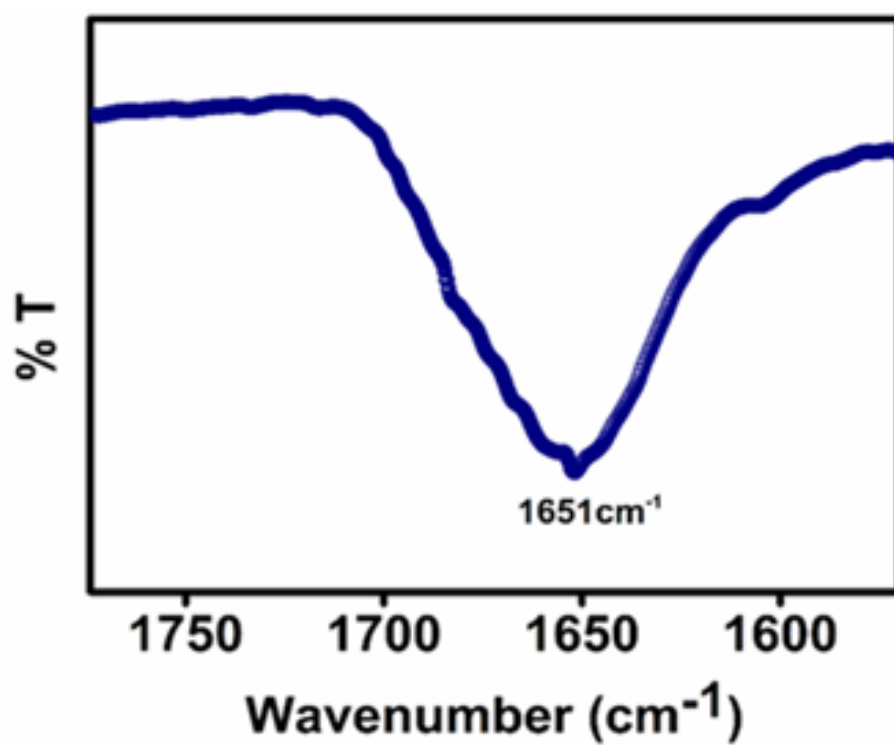

Figure S5: FTIR spectrum of the P1 peptide showing a characteristic helical peak.

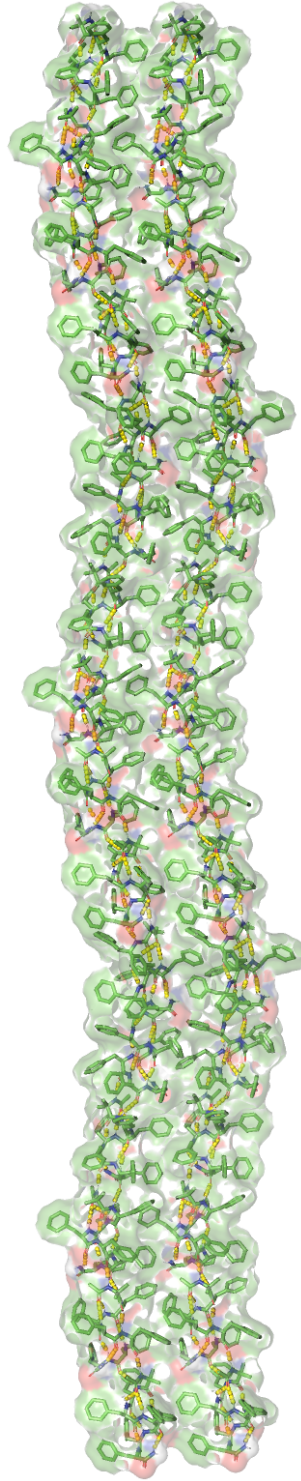

**Figure S6:** Super helical packing of the **P2** peptide through head to tail hydrogen bonding.

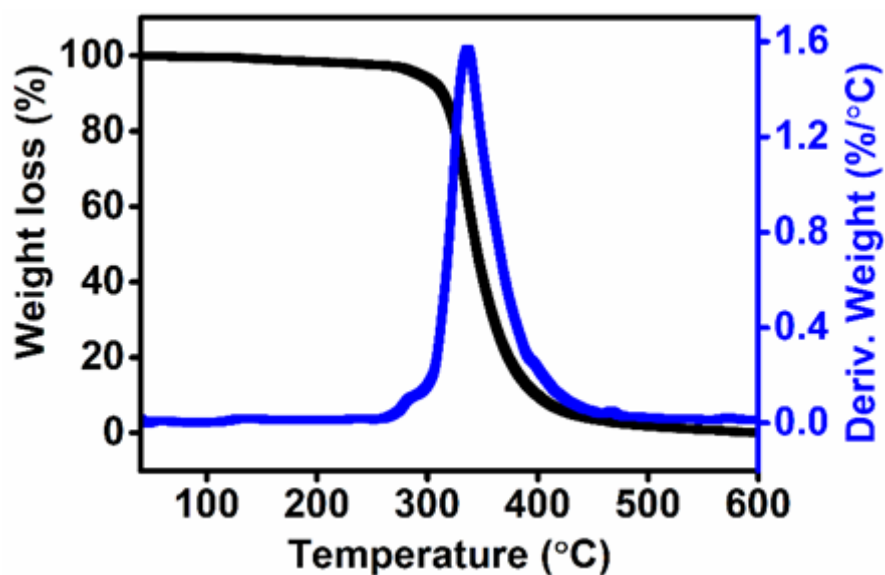

**Figure S7:** Thermogravimetric analysis of P2 crystals (black curve) revealing the high thermal stability ( $\geq 300$  °C). The weight loss is depicted by the first derivative curve (blue).

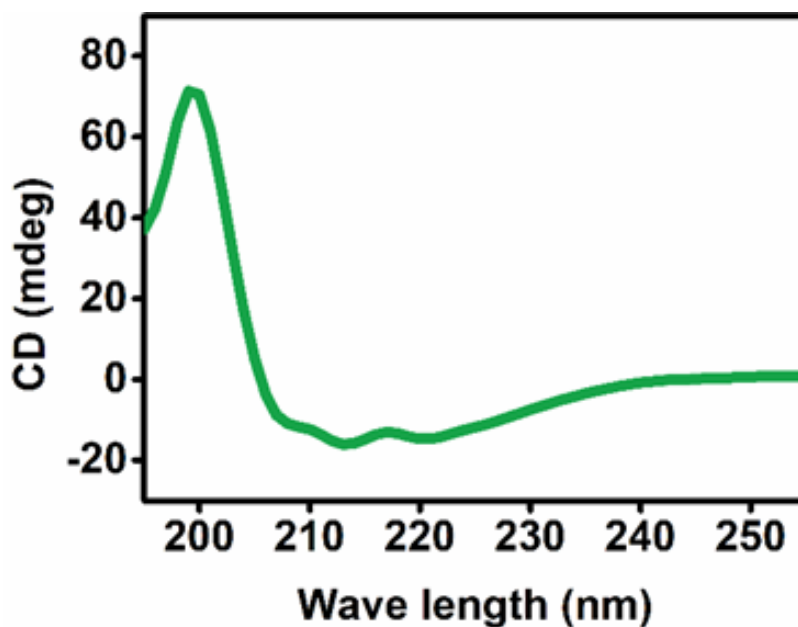

**Figure S8:** CD spectrum of the P2 peptide in TFE (0.5mg/mL), indicating helical organization.

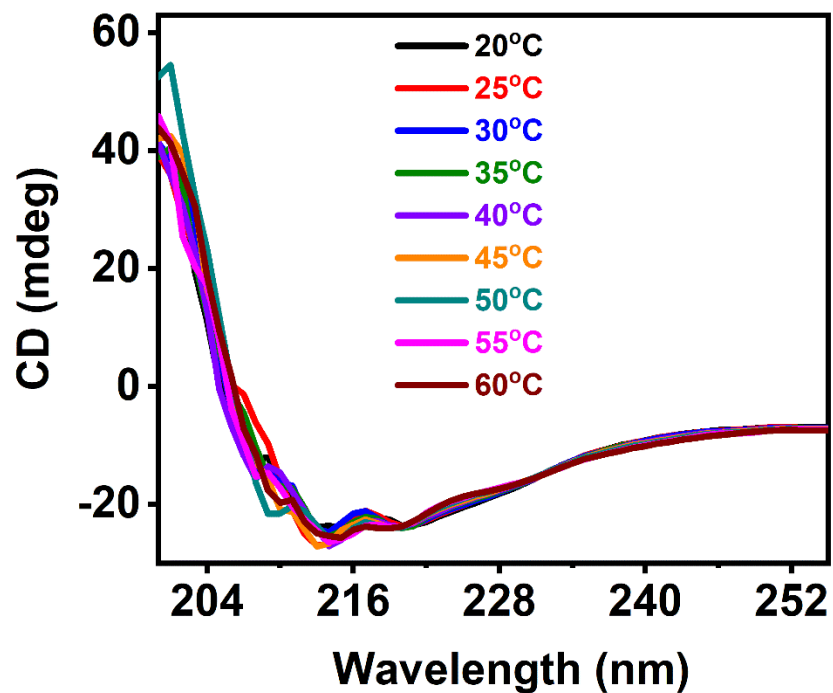

**Figure S9:** Temperature-dependent CD spectrum of the P2 peptide in TFE (0.5mg/mL).

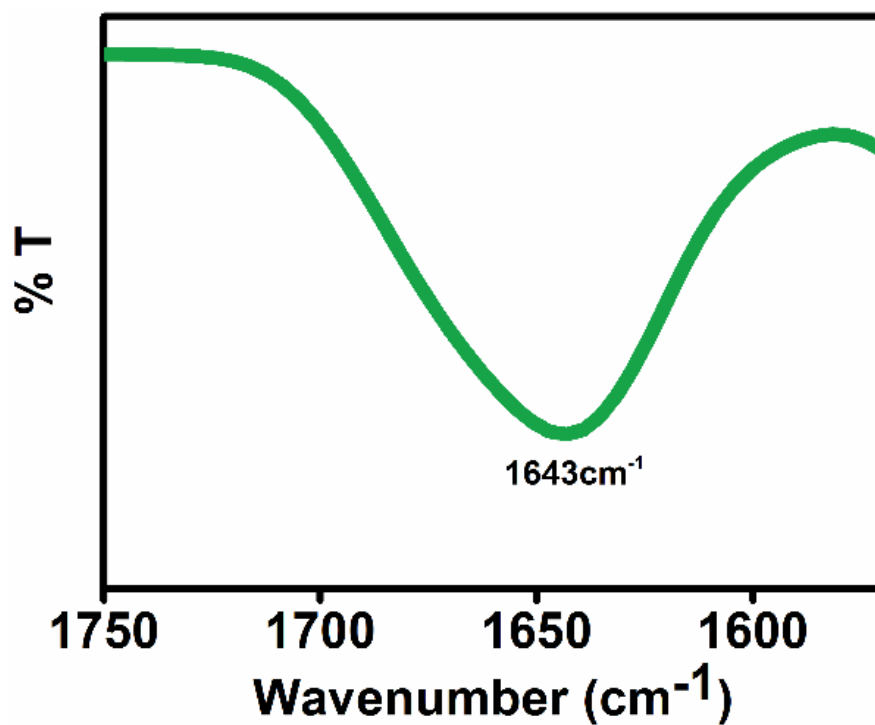

**Figure S10:** FTIR spectrum of the P2 peptide showing a characteristic helical peak.

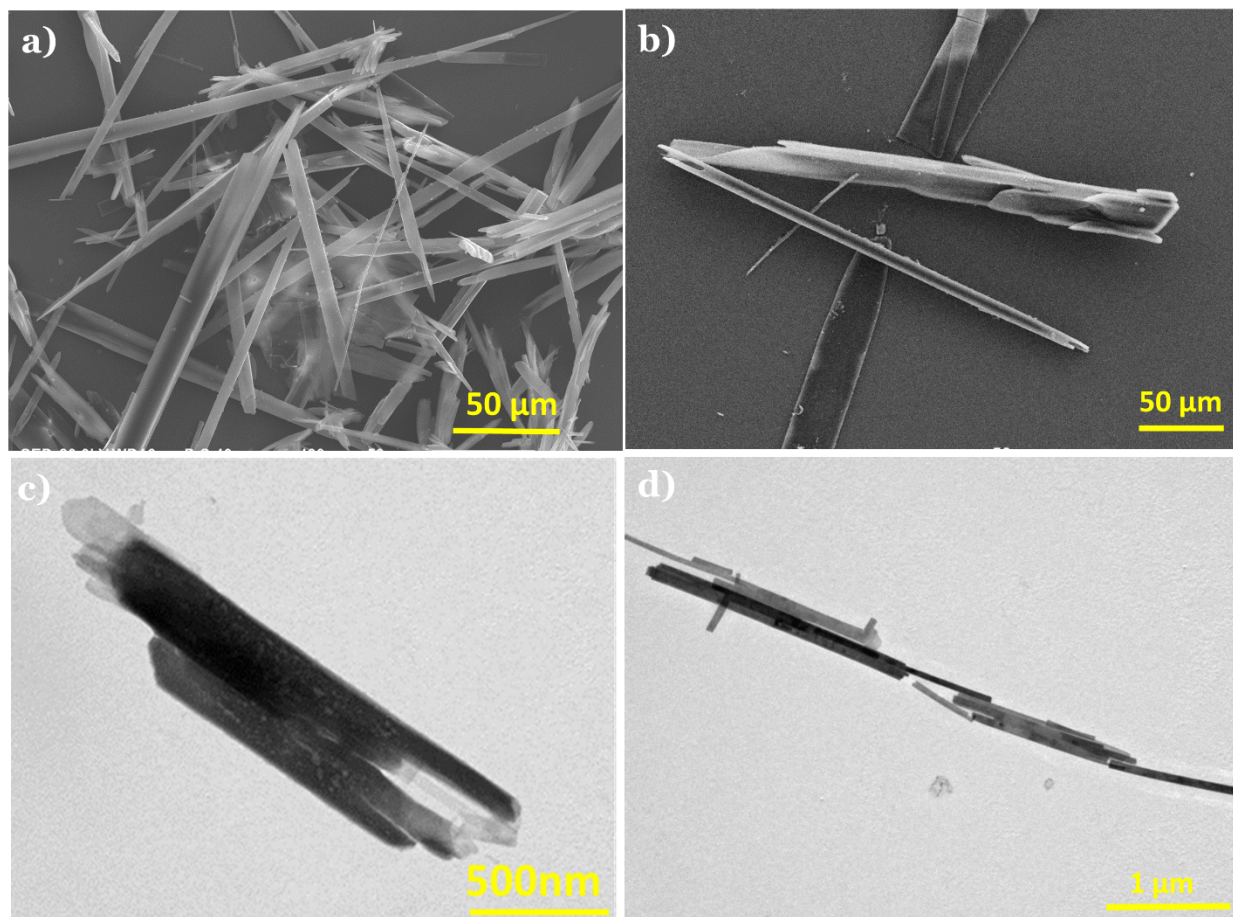

**Figure S11:** a, b) SEM and c, d) TEM images of the supramolecular assembly needle-like microstructure formed by the **P1** peptide in a 2:8 THF/water combination.



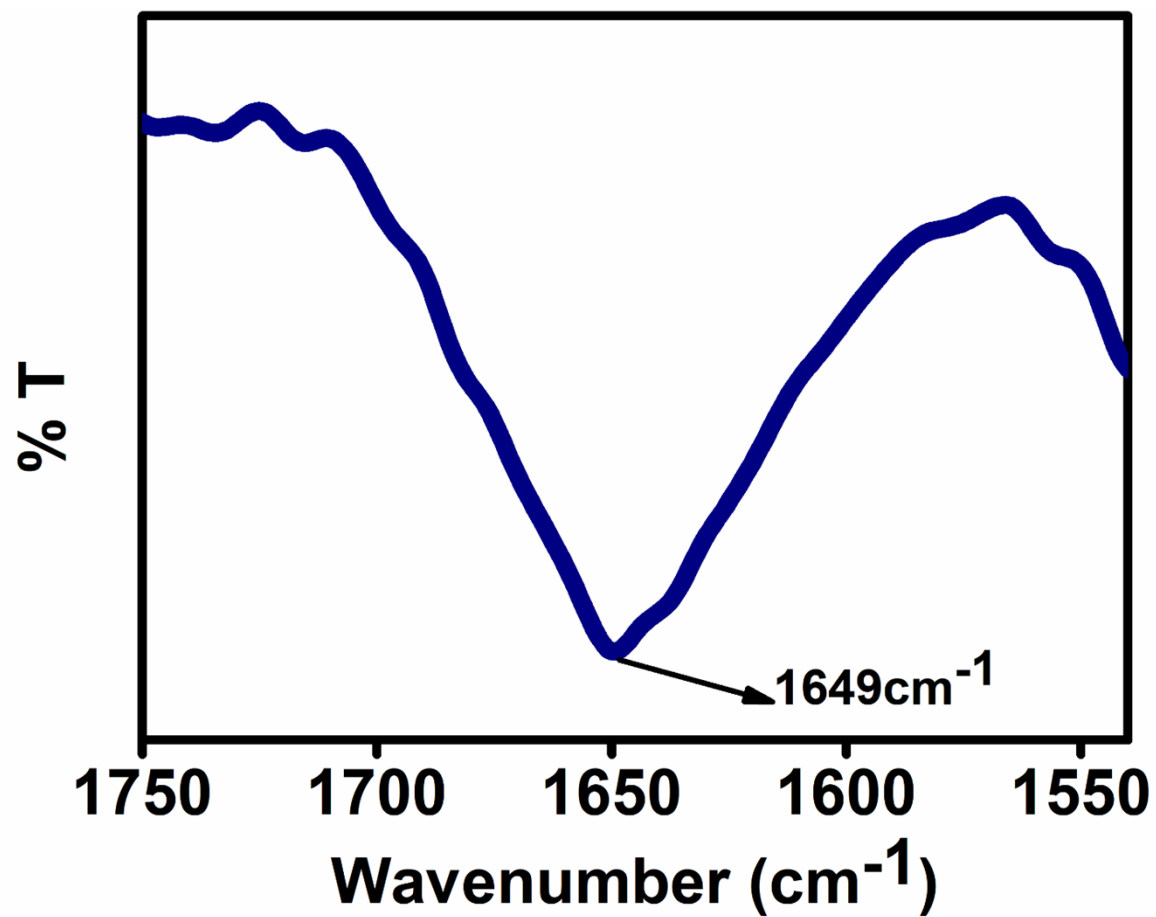

**Figure S12:** FTIR spectrum of the helical P1 peptide in a 2:8 THF/water combination.

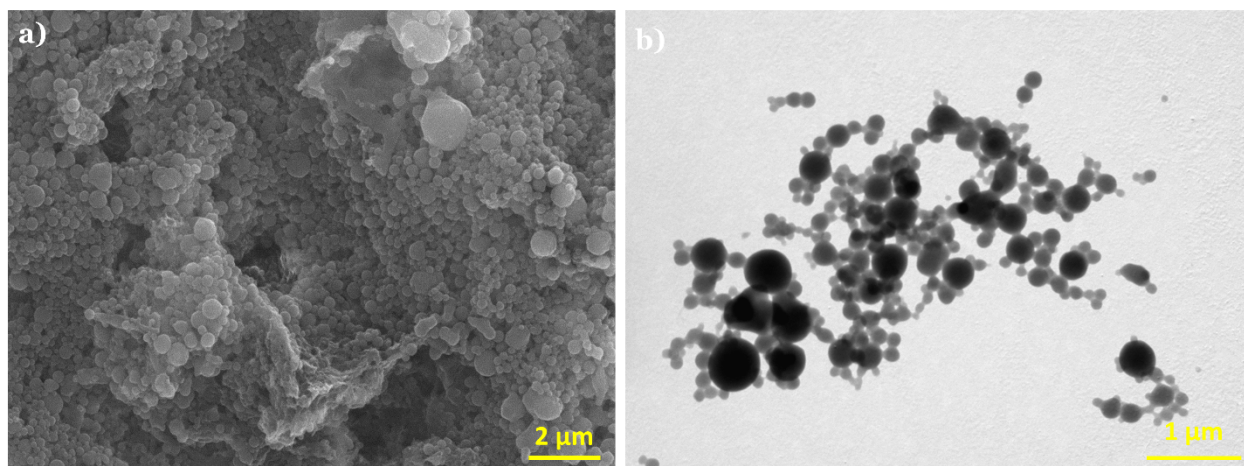

**Figure S13:** a) SEM and b) TEM images of the supramolecular assembly spherical microstructure formed by the helical **P2** peptide in a 2:8 THF/water combination.

**Table S5:** Refinement statics data for peptide **P1**

|                                                               |                              |
|---------------------------------------------------------------|------------------------------|
| CCDC number                                                   | 2123307                      |
| Crystal description                                           | Colourless plate             |
| Diffractionmeter                                              | Rigaku XtaLab <sup>Pro</sup> |
| Empirical formula                                             | C110 H128 N16 O17            |
| Formula weight (g/mol)                                        | 1946.28                      |
| Temperature (K)                                               | 100 (2)                      |
| Wavelength (Å)                                                | 1.54184                      |
| Crystal system                                                | Orthorhombic                 |
| Space group                                                   | <i>C</i> 222 <sub>1</sub>    |
| a, Å                                                          | 14.9385(1)                   |
| b, Å                                                          | 29.7180(3)                   |
| c, Å                                                          | 27.4444(2)                   |
| $\alpha^\circ$                                                | 90                           |
| $\beta^\circ$                                                 | 90                           |
| $\gamma^\circ$                                                | 90                           |
| Volume (Å <sup>3</sup> )                                      | 12183.71(18)                 |
| Z                                                             | 4                            |
| dcalc (mg/cm <sup>3</sup> )                                   | 1.016                        |
| $\mu$ (mm <sup>-1</sup> )                                     | 0.588                        |
| F(000)                                                        | 4144                         |
| Theta range for data collection (°)                           | 3.683 to 80.272              |
| Reflections collected (unique)                                | 52855 (13016)                |
| Rint                                                          | 0.0213                       |
| completeness                                                  | 99.7                         |
| Data/restraints/parameters                                    | 13016/60/608                 |
| Final R [ <i>I</i> > 2 $\sigma$ ( <i>I</i> )]                 | R1=0.0848 wR2=0.2574         |
| R (all data)                                                  | R1=0.0875 wR2=0.2528         |
| Goodness of Fit                                               | 1.107                        |
| Largest diff. peak and hole (e <sup>-</sup> Å <sup>-3</sup> ) | 0.401, -0.271                |

**Table S6:** Refinement statics data for peptide **P2**

|                                                               |                         |
|---------------------------------------------------------------|-------------------------|
| CCDC number                                                   | 2132310                 |
| Crystal description                                           | Colourless needle       |
| Diffractionmeter                                              | Rigaku Synergy R        |
| Empirical formula                                             | C60 H66 N8 O8           |
| Formula weight (g/mol)                                        | 1027.20                 |
| Temperature (K)                                               | 100 (2)                 |
| Wavelength (Å)                                                | 1.54184                 |
| Crystal system                                                | hexagonal               |
| Space group                                                   | <i>P</i> 6 <sub>1</sub> |
| a, Å                                                          | 11.9093(2)              |
| b, Å                                                          | 11.9093(2)              |
| c, Å                                                          | 68.9715(10)             |
| $\alpha^\circ$                                                | 90                      |
| $\beta^\circ$                                                 | 90                      |
| $\gamma^\circ$                                                | 120                     |
| Volume (Å <sup>3</sup> )                                      | 8471.7(3)               |
| Z                                                             | 6                       |
| dcalc (mg/cm <sup>3</sup> )                                   | 1.208                   |
| $\mu$ (mm <sup>-1</sup> )                                     | 0.655                   |
| F(000)                                                        | 3276                    |
| Theta range for data collection (°)                           | 3.85 to 73.68           |
| Reflections collected (unique)                                | 45992(9676)             |
| Rint                                                          | 0.0381                  |
| completeness                                                  | 99.8                    |
| Data/restraints/parameters                                    | 9676/37/637             |
| Final R [ <i>I</i> > 2 $\sigma$ ( <i>I</i> )]                 | R1=0.0626 wR2=0.1627    |
| R (all data)                                                  | R1=0.0772 wR2=0.1751    |
| Goodness of Fit                                               | 1.068                   |
| Largest diff. peak and hole (e <sup>-</sup> Å <sup>-3</sup> ) | 0.727, -0.552           |

## HPLC REPORT FOR PEPTIDE P1

|             |                                                   |                 |                                      |
|-------------|---------------------------------------------------|-----------------|--------------------------------------|
| Sample:     | Ac-Aib (FF) <sub>5</sub> -Aib-NH <sub>2</sub>     | Analyzed date:  | 2021-6-18                            |
| Analyst:    | HCM                                               | Reconstitution: | 1mg/0.25mlACN:0.75mlH <sub>2</sub> O |
| Lot. No.:   | P210507-JQ873944                                  |                 |                                      |
| Column:     | 4.6×250mm, Kromasil 100-5 C18                     |                 |                                      |
| Solvent A   | A: 0.1% Trifluoroacetic Acid in 100% Acetonitrile |                 |                                      |
| Solvent B   | B: 0.1% Trifluoroacetic Acid in 100% Water        |                 |                                      |
| Gradient:   | A                                                 | B               |                                      |
|             | 0.0min                                            | 40%             | 60%                                  |
|             | 25.0min                                           | 65%             | 35%                                  |
|             | 25.1min                                           | 100%            | 0%                                   |
|             | 30.0min                                           | Stop            |                                      |
| Volume:     | 5μl                                               |                 |                                      |
| Wavelength: | 220nm                                             |                 |                                      |
| Flow rate:  | 1.0ml/min                                         |                 |                                      |

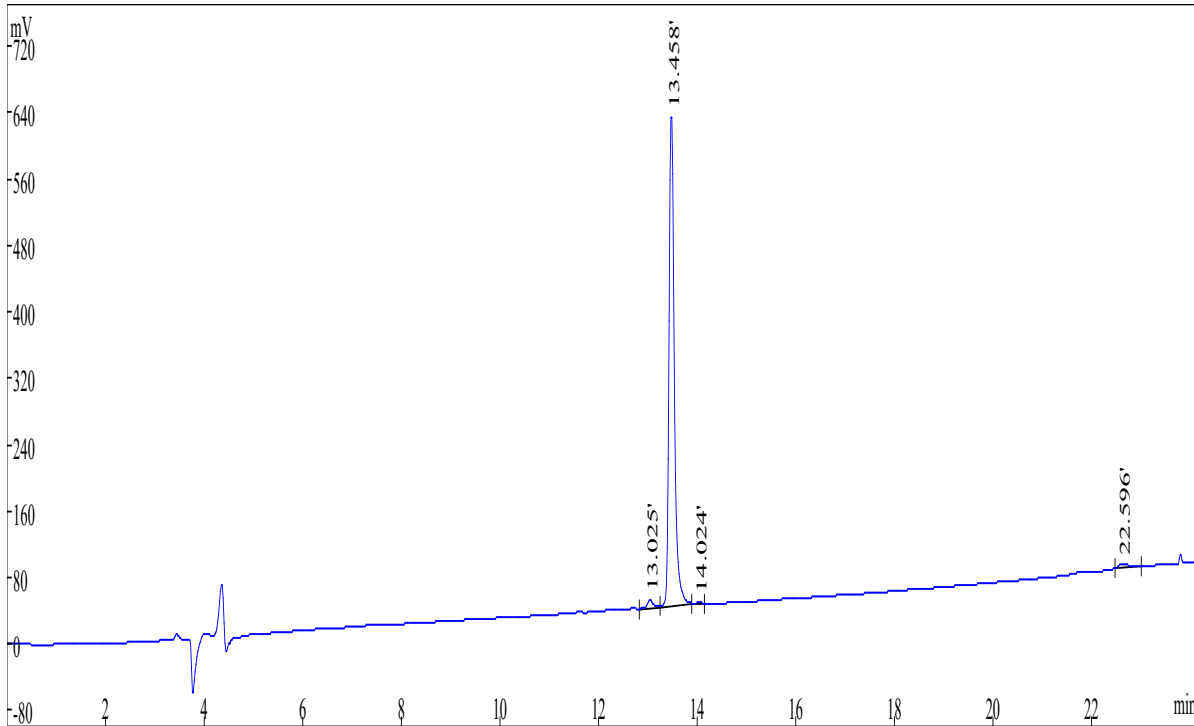

| Rank  | Time   | Conc.  | Area    | Height |
|-------|--------|--------|---------|--------|
| 1     | 13.025 | 1.944  | 77747   | 9802   |
| 2     | 13.458 | 95.95  | 3836646 | 589252 |
| 3     | 14.024 | 0.5283 | 21125   | 2325   |
| 4     | 22.596 | 1.577  | 63071   | 5090   |
| Total |        | 100    | 3998589 | 606469 |

# MASS SPECTROMETRY REPORT PEPTIDE P1

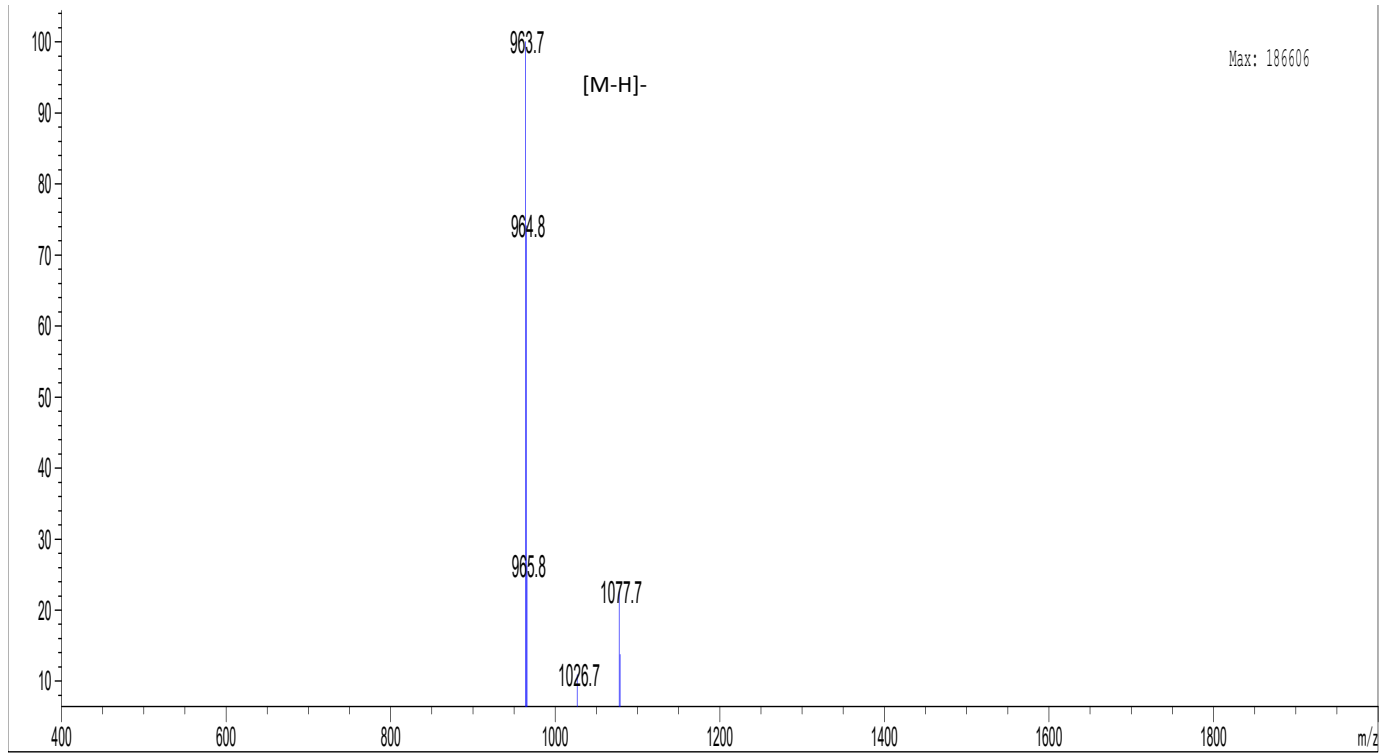

## Sample Description

Analyzed date: 2022-04-18  
Analyst: YU  
Sample: FF-5  
M.W.: 965.17  
Lot. No.: P210507-JQ873944

## Instrument

Probe: ESI  
Nebulizer Gas Flow: 1.5L/min  
CDL: -20.0v  
CDL Temp.: 250 °C  
Block Temp.: 200 °C

## HPLC REPORT FOR PEPTIDE P2

Sample: AC-Aib(FF)<sub>6</sub>-NH<sub>2</sub> Analyzed date: 2021-5-28  
Analyst: HCM Reconstitution: 1mg/0.25mlACN:0.75mlH<sub>2</sub>O  
Lot. No.: P210507-JQ895413  
Column: 4.6×250mm, Kromasil 100-5 C18  
Solvent A: A: 0.1% Trifluoroacetic Acid in 100% Acetonitrile  
Solvent B: B: 0.1% Trifluoroacetic Acid in 100% Water  
Gradient:

|         | A    | B   |
|---------|------|-----|
| 0.0min  | 50%  | 50% |
| 25.0min | 100% | 0%  |
| 25.1min | 100% | 0%  |
| 30.0min | Stop |     |

Volume: 5µl  
Wavelength: 220nm  
Flow rate: 1.0ml/min

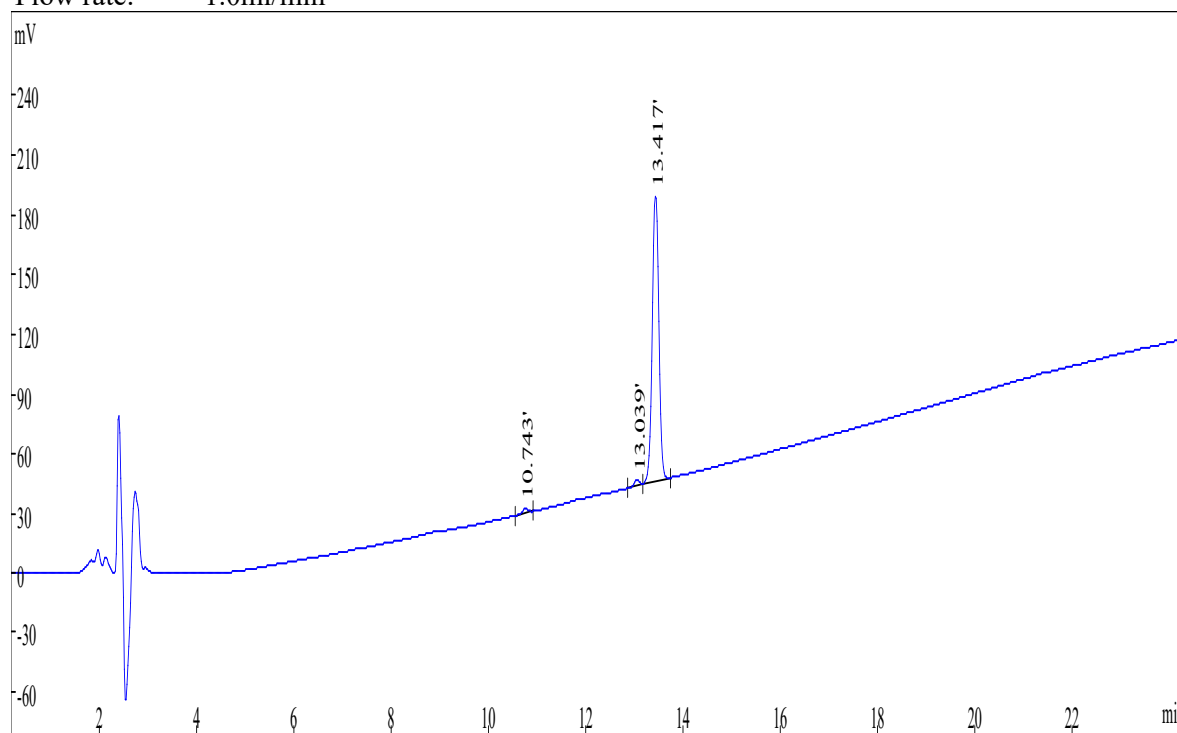

| Rank  | Time   | Conc. | Area    | Height |
|-------|--------|-------|---------|--------|
| 1     | 10.743 | 1.351 | 16877   | 2178   |
| 2     | 13.039 | 1.69  | 21117   | 2794   |
| 3     | 13.417 | 96.96 | 1211483 | 143101 |
| Total |        | 100   | 1249477 | 148073 |

## MASS SPECTROMETRY REPORT PEPTIDE P2

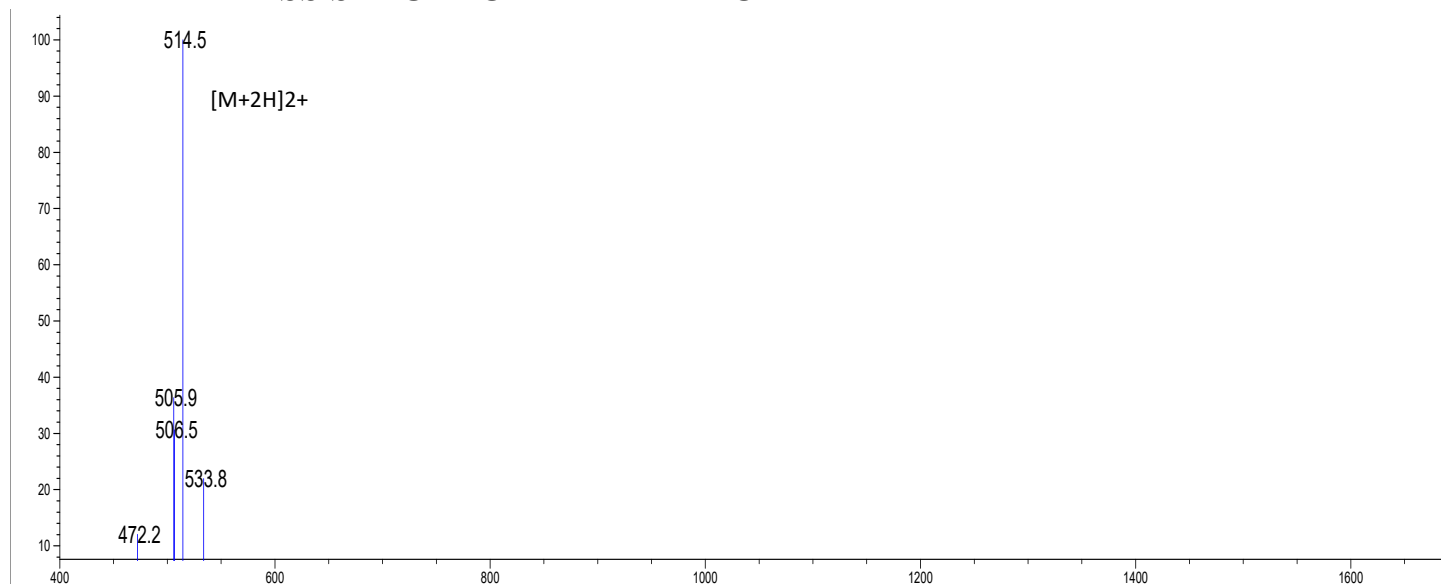

### Sample Description

Analyzed date: 2021-05-28  
Analyst: YU  
Sample: AC-AibFF-6-NH2  
M.W.: 1027.24  
Lot. No.: P210507-JQ895413

### Instrument

Probe: ESI  
Nebulizer Gas Flow: 1.5L/min  
CDL: -20.0v  
CDL Temp.: 250 °C  
Block Temp.: 200 °C

Agilent-6125B

Probe Bias:  
Detector:  
T. Flow:  
B. Conc.:



**References:**

1. G. M. Sheldrick, *Acta Cryst.* 2015, C71, 3-8
